# Supplementary material for: Comparison of feeding preferences of herbivorous fishes and the sea urchin Diadema antillarum in Little Cayman
Source: PeerJ. 2023 Nov 15;11:e16264. doi: 10.7717/peerj.16264 (PMC10656904; doi:10.7717/peerj.16264)
Supplement: Supplemental Information 5 — Results from feeding assays and feeding preference videos. [file peerj-11-16264-s005.xlsx]

## Sheet: Metadata
Project Title	Comparison of feeding preferences of herbivorous fishes and the sea urchin Diadema antillarum in Little Cayman
Contact Info	Lindsay Spiers- Lindsay.Spiers@MyFWC.com
Location	Little Cayman, Cayman Islands
Type of experiment	Choice feeding assay conducted in a field setting
Experiment dates	Feeding assays were conducted September to October 2017 and feeding preference experiments were conducted in October 2018
Purpose of each tab	Feeding Assay tab contains the data on if each piece of each macrophyte species was eaten (0) or not (1) at the conclusion of the experiment. In addition the data is divided by trial number and depth.
	Species Preference tab contains data about bites taken of each macrophyte species and by which herbivore. Data reported is the percent of bites taken on each macrophyte species categorized by herbivore. The site is also listed as Shallow or Deep.

## Sheet: Feeding Assay
Macrophyte Species	Status	Trial	Site	Date
Galaxaura	1	One	Shallow	2021-09-23		For status 1=not eaten and 0= eaten
Galaxaura	1	One	Shallow	2021-09-23
Galaxaura	1	One	Shallow	2021-09-23
Galaxaura	1	One	Shallow	2021-09-23
Galaxaura	1	One	Shallow	2021-09-23
Galaxaura	1	One	Shallow	2021-09-23
Galaxaura	1	One	Shallow	2021-09-23
Galaxaura	1	One	Shallow	2021-09-23
Galaxaura	1	One	Shallow	2021-09-23
Galaxaura	1	One	Shallow	2021-09-23
Galaxaura	1	One	Shallow	2021-09-23
Galaxaura	1	One	Shallow	2021-09-23
Galaxaura	1	One	Shallow	2021-09-23
Galaxaura	1	One	Shallow	2021-09-23
Galaxaura	1	One	Shallow	2021-09-23
Lobophora	1	One	Shallow	2021-09-23
Lobophora	1	One	Shallow	2021-09-23
Lobophora	0	One	Shallow	2021-09-23
Lobophora	0	One	Shallow	2021-09-23
Lobophora	0	One	Shallow	2021-09-23
Lobophora	0	One	Shallow	2021-09-23
Lobophora	0	One	Shallow	2021-09-23
Lobophora	0	One	Shallow	2021-09-23
Lobophora	0	One	Shallow	2021-09-23
Lobophora	0	One	Shallow	2021-09-23
Lobophora	0	One	Shallow	2021-09-23
Lobophora	0	One	Shallow	2021-09-23
Lobophora	0	One	Shallow	2021-09-23
Lobophora	0	One	Shallow	2021-09-23
Lobophora	0	One	Shallow	2021-09-23
Laurencia 1	1	One	Shallow	2021-09-23
Laurencia 1	1	One	Shallow	2021-09-23
Laurencia 1	0	One	Shallow	2021-09-23
Laurencia 1	0	One	Shallow	2021-09-23
Laurencia 1	0	One	Shallow	2021-09-23
Laurencia 1	0	One	Shallow	2021-09-23
Laurencia 1	0	One	Shallow	2021-09-23
Laurencia 1	0	One	Shallow	2021-09-23
Laurencia 1	0	One	Shallow	2021-09-23
Laurencia 1	0	One	Shallow	2021-09-23
Laurencia 1	0	One	Shallow	2021-09-23
Laurencia 1	0	One	Shallow	2021-09-23
Laurencia 1	0	One	Shallow	2021-09-23
Laurencia 1	0	One	Shallow	2021-09-23
Laurencia 1	0	One	Shallow	2021-09-23
Thalassia	1	One	Shallow	2021-09-23
Thalassia	1	One	Shallow	2021-09-23
Thalassia	1	One	Shallow	2021-09-23
Thalassia	1	One	Shallow	2021-09-23
Thalassia	1	One	Shallow	2021-09-23
Thalassia	0	One	Shallow	2021-09-23
Thalassia	0	One	Shallow	2021-09-23
Thalassia	0	One	Shallow	2021-09-23
Thalassia	0	One	Shallow	2021-09-23
Thalassia	0	One	Shallow	2021-09-23
Thalassia	0	One	Shallow	2021-09-23
Thalassia	0	One	Shallow	2021-09-23
Thalassia	0	One	Shallow	2021-09-23
Thalassia	0	One	Shallow	2021-09-23
Thalassia	0	One	Shallow	2021-09-23
Lobophora	0	Two	Shallow	2021-09-25
Lobophora	0	Two	Shallow	2021-09-25
Lobophora	0	Two	Shallow	2021-09-25
Lobophora	0	Two	Shallow	2021-09-25
Lobophora	0	Two	Shallow	2021-09-25
Lobophora	0	Two	Shallow	2021-09-25
Lobophora	0	Two	Shallow	2021-09-25
Lobophora	0	Two	Shallow	2021-09-25
Lobophora	0	Two	Shallow	2021-09-25
Lobophora	0	Two	Shallow	2021-09-25
Lobophora	0	Two	Shallow	2021-09-25
Lobophora	0	Two	Shallow	2021-09-25
Lobophora	0	Two	Shallow	2021-09-25
Lobophora	0	Two	Shallow	2021-09-25
Lobophora	0	Two	Shallow	2021-09-25
Laurencia 1	1	Two	Shallow	2021-09-25
Laurencia 1	1	Two	Shallow	2021-09-25
Laurencia 1	1	Two	Shallow	2021-09-25
Laurencia 1	0	Two	Shallow	2021-09-25
Laurencia 1	0	Two	Shallow	2021-09-25
Laurencia 1	0	Two	Shallow	2021-09-25
Laurencia 1	0	Two	Shallow	2021-09-25
Laurencia 1	0	Two	Shallow	2021-09-25
Laurencia 1	0	Two	Shallow	2021-09-25
Laurencia 1	0	Two	Shallow	2021-09-25
Laurencia 1	0	Two	Shallow	2021-09-25
Laurencia 1	0	Two	Shallow	2021-09-25
Laurencia 1	0	Two	Shallow	2021-09-25
Laurencia 1	0	Two	Shallow	2021-09-25
Laurencia 1	0	Two	Shallow	2021-09-25
Dictyota	1	Two	Shallow	2021-09-25
Dictyota	1	Two	Shallow	2021-09-25
Dictyota	1	Two	Shallow	2021-09-25
Dictyota	1	Two	Shallow	2021-09-25
Dictyota	1	Two	Shallow	2021-09-25
Dictyota	1	Two	Shallow	2021-09-25
Dictyota	1	Two	Shallow	2021-09-25
Dictyota	1	Two	Shallow	2021-09-25
Dictyota	1	Two	Shallow	2021-09-25
Dictyota	1	Two	Shallow	2021-09-25
Dictyota	1	Two	Shallow	2021-09-25
Dictyota	1	Two	Shallow	2021-09-25
Dictyota	1	Two	Shallow	2021-09-25
Dictyota	0	Two	Shallow	2021-09-25
Dictyota	0	Two	Shallow	2021-09-25
Palisada	1	Two	Shallow	2021-09-25
Palisada	1	Two	Shallow	2021-09-25
Palisada	1	Two	Shallow	2021-09-25
Palisada	1	Two	Shallow	2021-09-25
Palisada	0	Two	Shallow	2021-09-25
Palisada	0	Two	Shallow	2021-09-25
Palisada	0	Two	Shallow	2021-09-25
Palisada	0	Two	Shallow	2021-09-25
Palisada	0	Two	Shallow	2021-09-25
Palisada	0	Two	Shallow	2021-09-25
Palisada	0	Two	Shallow	2021-09-25
Palisada	0	Two	Shallow	2021-09-25
Palisada	0	Two	Shallow	2021-09-25
Palisada	0	Two	Shallow	2021-09-25
Palisada	0	Two	Shallow	2021-09-25
Halimeda	1	Three	Shallow	2021-09-27
Halimeda	1	Three	Shallow	2021-09-27
Halimeda	1	Three	Shallow	2021-09-27
Halimeda	1	Three	Shallow	2021-09-27
Halimeda	1	Three	Shallow	2021-09-27
Halimeda	1	Three	Shallow	2021-09-27
Halimeda	1	Three	Shallow	2021-09-27
Halimeda	1	Three	Shallow	2021-09-27
Halimeda	1	Three	Shallow	2021-09-27
Halimeda	1	Three	Shallow	2021-09-27
Halimeda	1	Three	Shallow	2021-09-27
Halimeda	1	Three	Shallow	2021-09-27
Halimeda	1	Three	Shallow	2021-09-27
Halimeda	1	Three	Shallow	2021-09-27
Halimeda	1	Three	Shallow	2021-09-27
Laurencia 1	1	Three	Shallow	2021-09-27
Laurencia 1	0	Three	Shallow	2021-09-27
Laurencia 1	0	Three	Shallow	2021-09-27
Laurencia 1	0	Three	Shallow	2021-09-27
Laurencia 1	0	Three	Shallow	2021-09-27
Laurencia 1	0	Three	Shallow	2021-09-27
Laurencia 1	0	Three	Shallow	2021-09-27
Laurencia 1	0	Three	Shallow	2021-09-27
Laurencia 1	0	Three	Shallow	2021-09-27
Laurencia 1	0	Three	Shallow	2021-09-27
Laurencia 1	0	Three	Shallow	2021-09-27
Laurencia 1	0	Three	Shallow	2021-09-27
Laurencia 1	0	Three	Shallow	2021-09-27
Laurencia 1	0	Three	Shallow	2021-09-27
Laurencia 1	0	Three	Shallow	2021-09-27
Thalassia	1	Three	Shallow	2021-09-27
Thalassia	1	Three	Shallow	2021-09-27
Thalassia	1	Three	Shallow	2021-09-27
Thalassia	1	Three	Shallow	2021-09-27
Thalassia	0	Three	Shallow	2021-09-27
Thalassia	0	Three	Shallow	2021-09-27
Thalassia	0	Three	Shallow	2021-09-27
Thalassia	0	Three	Shallow	2021-09-27
Thalassia	0	Three	Shallow	2021-09-27
Thalassia	0	Three	Shallow	2021-09-27
Thalassia	0	Three	Shallow	2021-09-27
Thalassia	0	Three	Shallow	2021-09-27
Thalassia	0	Three	Shallow	2021-09-27
Thalassia	0	Three	Shallow	2021-09-27
Thalassia	0	Three	Shallow	2021-09-27
Galaxaura	1	Three	Shallow	2021-09-27
Galaxaura	1	Three	Shallow	2021-09-27
Galaxaura	1	Three	Shallow	2021-09-27
Galaxaura	1	Three	Shallow	2021-09-27
Galaxaura	1	Three	Shallow	2021-09-27
Galaxaura	1	Three	Shallow	2021-09-27
Galaxaura	1	Three	Shallow	2021-09-27
Galaxaura	1	Three	Shallow	2021-09-27
Galaxaura	1	Three	Shallow	2021-09-27
Galaxaura	1	Three	Shallow	2021-09-27
Galaxaura	1	Three	Shallow	2021-09-27
Galaxaura	1	Three	Shallow	2021-09-27
Galaxaura	1	Three	Shallow	2021-09-27
Galaxaura	1	Three	Shallow	2021-09-27
Galaxaura	1	Three	Shallow	2021-09-27
Halimeda	1	Four	Shallow	2021-09-29
Halimeda	1	Four	Shallow	2021-09-29
Halimeda	1	Four	Shallow	2021-09-29
Halimeda	1	Four	Shallow	2021-09-29
Halimeda	1	Four	Shallow	2021-09-29
Halimeda	1	Four	Shallow	2021-09-29
Halimeda	1	Four	Shallow	2021-09-29
Halimeda	1	Four	Shallow	2021-09-29
Halimeda	1	Four	Shallow	2021-09-29
Halimeda	1	Four	Shallow	2021-09-29
Halimeda	1	Four	Shallow	2021-09-29
Halimeda	1	Four	Shallow	2021-09-29
Halimeda	1	Four	Shallow	2021-09-29
Halimeda	1	Four	Shallow	2021-09-29
Halimeda	1	Four	Shallow	2021-09-29
Dictyota	0	Four	Shallow	2021-09-29
Dictyota	0	Four	Shallow	2021-09-29
Dictyota	1	Four	Shallow	2021-09-29
Dictyota	1	Four	Shallow	2021-09-29
Dictyota	1	Four	Shallow	2021-09-29
Dictyota	1	Four	Shallow	2021-09-29
Dictyota	1	Four	Shallow	2021-09-29
Dictyota	1	Four	Shallow	2021-09-29
Dictyota	1	Four	Shallow	2021-09-29
Dictyota	1	Four	Shallow	2021-09-29
Dictyota	1	Four	Shallow	2021-09-29
Dictyota	1	Four	Shallow	2021-09-29
Dictyota	1	Four	Shallow	2021-09-29
Dictyota	1	Four	Shallow	2021-09-29
Dictyota	1	Four	Shallow	2021-09-29
Lobophora	0	Four	Shallow	2021-09-29
Lobophora	0	Four	Shallow	2021-09-29
Lobophora	0	Four	Shallow	2021-09-29
Lobophora	0	Four	Shallow	2021-09-29
Lobophora	0	Four	Shallow	2021-09-29
Lobophora	0	Four	Shallow	2021-09-29
Lobophora	0	Four	Shallow	2021-09-29
Lobophora	0	Four	Shallow	2021-09-29
Lobophora	0	Four	Shallow	2021-09-29
Lobophora	0	Four	Shallow	2021-09-29
Lobophora	0	Four	Shallow	2021-09-29
Lobophora	0	Four	Shallow	2021-09-29
Lobophora	0	Four	Shallow	2021-09-29
Lobophora	0	Four	Shallow	2021-09-29
Lobophora	0	Four	Shallow	2021-09-29
Turbinaria	0	Four	Shallow	2021-09-29
Turbinaria	0	Four	Shallow	2021-09-29
Turbinaria	0	Four	Shallow	2021-09-29
Turbinaria	0	Four	Shallow	2021-09-29
Turbinaria	0	Four	Shallow	2021-09-29
Turbinaria	0	Four	Shallow	2021-09-29
Turbinaria	0	Four	Shallow	2021-09-29
Turbinaria	0	Four	Shallow	2021-09-29
Turbinaria	0	Four	Shallow	2021-09-29
Turbinaria	0	Four	Shallow	2021-09-29
Turbinaria	0	Four	Shallow	2021-09-29
Turbinaria	0	Four	Shallow	2021-09-29
Turbinaria	0	Four	Shallow	2021-09-29
Turbinaria	0	Four	Shallow	2021-09-29
Turbinaria	0	Four	Shallow	2021-09-29
Laurencia 2	1	Five	Shallow	2021-10-03
Laurencia 2	1	Five	Shallow	2021-10-03
Laurencia 2	1	Five	Shallow	2021-10-03
Laurencia 2	1	Five	Shallow	2021-10-03
Laurencia 2	1	Five	Shallow	2021-10-03
Laurencia 2	1	Five	Shallow	2021-10-03
Laurencia 2	0	Five	Shallow	2021-10-03
Laurencia 2	0	Five	Shallow	2021-10-03
Laurencia 2	0	Five	Shallow	2021-10-03
Laurencia 2	0	Five	Shallow	2021-10-03
Laurencia 2	0	Five	Shallow	2021-10-03
Laurencia 2	0	Five	Shallow	2021-10-03
Laurencia 2	0	Five	Shallow	2021-10-03
Laurencia 2	0	Five	Shallow	2021-10-03
Laurencia 2	0	Five	Shallow	2021-10-03
Thalassia	0	Five	Shallow	2021-10-03
Thalassia	0	Five	Shallow	2021-10-03
Thalassia	0	Five	Shallow	2021-10-03
Thalassia	0	Five	Shallow	2021-10-03
Thalassia	0	Five	Shallow	2021-10-03
Thalassia	0	Five	Shallow	2021-10-03
Thalassia	0	Five	Shallow	2021-10-03
Thalassia	0	Five	Shallow	2021-10-03
Thalassia	0	Five	Shallow	2021-10-03
Thalassia	0	Five	Shallow	2021-10-03
Thalassia	0	Five	Shallow	2021-10-03
Thalassia	0	Five	Shallow	2021-10-03
Thalassia	0	Five	Shallow	2021-10-03
Thalassia	0	Five	Shallow	2021-10-03
Thalassia	0	Five	Shallow	2021-10-03
Lobophora	0	Five	Shallow	2021-10-03
Lobophora	0	Five	Shallow	2021-10-03
Lobophora	0	Five	Shallow	2021-10-03
Lobophora	0	Five	Shallow	2021-10-03
Lobophora	0	Five	Shallow	2021-10-03
Lobophora	0	Five	Shallow	2021-10-03
Lobophora	0	Five	Shallow	2021-10-03
Lobophora	0	Five	Shallow	2021-10-03
Lobophora	0	Five	Shallow	2021-10-03
Lobophora	0	Five	Shallow	2021-10-03
Lobophora	0	Five	Shallow	2021-10-03
Lobophora	0	Five	Shallow	2021-10-03
Lobophora	0	Five	Shallow	2021-10-03
Lobophora	0	Five	Shallow	2021-10-03
Lobophora	0	Five	Shallow	2021-10-03
Turbinaria	0	Five	Shallow	2021-10-03
Turbinaria	0	Five	Shallow	2021-10-03
Turbinaria	0	Five	Shallow	2021-10-03
Turbinaria	0	Five	Shallow	2021-10-03
Turbinaria	0	Five	Shallow	2021-10-03
Turbinaria	0	Five	Shallow	2021-10-03
Turbinaria	0	Five	Shallow	2021-10-03
Turbinaria	0	Five	Shallow	2021-10-03
Turbinaria	0	Five	Shallow	2021-10-03
Turbinaria	0	Five	Shallow	2021-10-03
Turbinaria	0	Five	Shallow	2021-10-03
Turbinaria	0	Five	Shallow	2021-10-03
Turbinaria	0	Five	Shallow	2021-10-03
Turbinaria	0	Five	Shallow	2021-10-03
Turbinaria	0	Five	Shallow	2021-10-03
Galaxaura	1	Six	Shallow	2021-10-13
Galaxaura	1	Six	Shallow	2021-10-13
Galaxaura	1	Six	Shallow	2021-10-13
Galaxaura	1	Six	Shallow	2021-10-13
Galaxaura	1	Six	Shallow	2021-10-13
Galaxaura	1	Six	Shallow	2021-10-13
Galaxaura	1	Six	Shallow	2021-10-13
Galaxaura	1	Six	Shallow	2021-10-13
Galaxaura	1	Six	Shallow	2021-10-13
Galaxaura	1	Six	Shallow	2021-10-13
Galaxaura	1	Six	Shallow	2021-10-13
Galaxaura	1	Six	Shallow	2021-10-13
Galaxaura	1	Six	Shallow	2021-10-13
Galaxaura	1	Six	Shallow	2021-10-13
Galaxaura	1	Six	Shallow	2021-10-13
Palisada	1	Six	Shallow	2021-10-13
Palisada	1	Six	Shallow	2021-10-13
Palisada	1	Six	Shallow	2021-10-13
Palisada	1	Six	Shallow	2021-10-13
Palisada	1	Six	Shallow	2021-10-13
Palisada	1	Six	Shallow	2021-10-13
Palisada	1	Six	Shallow	2021-10-13
Palisada	0	Six	Shallow	2021-10-13
Palisada	0	Six	Shallow	2021-10-13
Palisada	0	Six	Shallow	2021-10-13
Palisada	0	Six	Shallow	2021-10-13
Palisada	0	Six	Shallow	2021-10-13
Palisada	0	Six	Shallow	2021-10-13
Palisada	0	Six	Shallow	2021-10-13
Palisada	0	Six	Shallow	2021-10-13
Thalassia	1	Six	Shallow	2021-10-13
Thalassia	1	Six	Shallow	2021-10-13
Thalassia	0	Six	Shallow	2021-10-13
Thalassia	0	Six	Shallow	2021-10-13
Thalassia	0	Six	Shallow	2021-10-13
Thalassia	0	Six	Shallow	2021-10-13
Thalassia	0	Six	Shallow	2021-10-13
Thalassia	0	Six	Shallow	2021-10-13
Thalassia	0	Six	Shallow	2021-10-13
Thalassia	0	Six	Shallow	2021-10-13
Thalassia	0	Six	Shallow	2021-10-13
Thalassia	0	Six	Shallow	2021-10-13
Thalassia	0	Six	Shallow	2021-10-13
Thalassia	0	Six	Shallow	2021-10-13
Thalassia	0	Six	Shallow	2021-10-13
Laurencia 2	1	Six	Shallow	2021-10-13
Laurencia 2	1	Six	Shallow	2021-10-13
Laurencia 2	1	Six	Shallow	2021-10-13
Laurencia 2	1	Six	Shallow	2021-10-13
Laurencia 2	1	Six	Shallow	2021-10-13
Laurencia 2	1	Six	Shallow	2021-10-13
Laurencia 2	1	Six	Shallow	2021-10-13
Laurencia 2	1	Six	Shallow	2021-10-13
Laurencia 2	0	Six	Shallow	2021-10-13
Laurencia 2	0	Six	Shallow	2021-10-13
Laurencia 2	0	Six	Shallow	2021-10-13
Laurencia 2	0	Six	Shallow	2021-10-13
Laurencia 2	0	Six	Shallow	2021-10-13
Laurencia 2	0	Six	Shallow	2021-10-13
Laurencia 2	0	Six	Shallow	2021-10-13
Halimeda	1	Seven	Shallow	2021-10-19
Halimeda	1	Seven	Shallow	2021-10-19
Halimeda	1	Seven	Shallow	2021-10-19
Halimeda	1	Seven	Shallow	2021-10-19
Halimeda	1	Seven	Shallow	2021-10-19
Halimeda	1	Seven	Shallow	2021-10-19
Halimeda	1	Seven	Shallow	2021-10-19
Halimeda	1	Seven	Shallow	2021-10-19
Halimeda	1	Seven	Shallow	2021-10-19
Halimeda	1	Seven	Shallow	2021-10-19
Halimeda	1	Seven	Shallow	2021-10-19
Halimeda	1	Seven	Shallow	2021-10-19
Halimeda	1	Seven	Shallow	2021-10-19
Halimeda	1	Seven	Shallow	2021-10-19
Halimeda	1	Seven	Shallow	2021-10-19
Laurencia 2	1	Seven	Shallow	2021-10-19
Laurencia 2	1	Seven	Shallow	2021-10-19
Laurencia 2	1	Seven	Shallow	2021-10-19
Laurencia 2	1	Seven	Shallow	2021-10-19
Laurencia 2	1	Seven	Shallow	2021-10-19
Laurencia 2	1	Seven	Shallow	2021-10-19
Laurencia 2	1	Seven	Shallow	2021-10-19
Laurencia 2	0	Seven	Shallow	2021-10-19
Laurencia 2	0	Seven	Shallow	2021-10-19
Laurencia 2	0	Seven	Shallow	2021-10-19
Laurencia 2	0	Seven	Shallow	2021-10-19
Laurencia 2	0	Seven	Shallow	2021-10-19
Laurencia 2	0	Seven	Shallow	2021-10-19
Laurencia 2	0	Seven	Shallow	2021-10-19
Laurencia 2	0	Seven	Shallow	2021-10-19
Turbinaria	1	Seven	Shallow	2021-10-19
Turbinaria	1	Seven	Shallow	2021-10-19
Turbinaria	1	Seven	Shallow	2021-10-19
Turbinaria	1	Seven	Shallow	2021-10-19
Turbinaria	0	Seven	Shallow	2021-10-19
Turbinaria	0	Seven	Shallow	2021-10-19
Turbinaria	0	Seven	Shallow	2021-10-19
Turbinaria	0	Seven	Shallow	2021-10-19
Turbinaria	0	Seven	Shallow	2021-10-19
Turbinaria	0	Seven	Shallow	2021-10-19
Turbinaria	0	Seven	Shallow	2021-10-19
Turbinaria	0	Seven	Shallow	2021-10-19
Turbinaria	0	Seven	Shallow	2021-10-19
Turbinaria	0	Seven	Shallow	2021-10-19
Turbinaria	0	Seven	Shallow	2021-10-19
Dictyota	1	Seven	Shallow	2021-10-19
Dictyota	1	Seven	Shallow	2021-10-19
Dictyota	1	Seven	Shallow	2021-10-19
Dictyota	1	Seven	Shallow	2021-10-19
Dictyota	1	Seven	Shallow	2021-10-19
Dictyota	1	Seven	Shallow	2021-10-19
Dictyota	1	Seven	Shallow	2021-10-19
Dictyota	1	Seven	Shallow	2021-10-19
Dictyota	0	Seven	Shallow	2021-10-19
Dictyota	0	Seven	Shallow	2021-10-19
Dictyota	0	Seven	Shallow	2021-10-19
Dictyota	0	Seven	Shallow	2021-10-19
Dictyota	0	Seven	Shallow	2021-10-19
Dictyota	0	Seven	Shallow	2021-10-19
Dictyota	0	Seven	Shallow	2021-10-19
Palisada	1	Seven	Shallow	2021-10-19
Palisada	1	Seven	Shallow	2021-10-19
Palisada	1	Seven	Shallow	2021-10-19
Palisada	0	Seven	Shallow	2021-10-19
Palisada	0	Seven	Shallow	2021-10-19
Palisada	0	Seven	Shallow	2021-10-19
Palisada	0	Seven	Shallow	2021-10-19
Palisada	0	Seven	Shallow	2021-10-19
Palisada	0	Seven	Shallow	2021-10-19
Palisada	0	Seven	Shallow	2021-10-19
Palisada	0	Seven	Shallow	2021-10-19
Palisada	0	Seven	Shallow	2021-10-19
Palisada	0	Seven	Shallow	2021-10-19
Palisada	0	Seven	Shallow	2021-10-19
Palisada	0	Seven	Shallow	2021-10-19
Laurencia 2	1	Eight	Deep	2021-10-09
Laurencia 2	1	Eight	Deep	2021-10-09
Laurencia 2	1	Eight	Deep	2021-10-09
Laurencia 2	1	Eight	Deep	2021-10-09
Laurencia 2	1	Eight	Deep	2021-10-09
Laurencia 2	0	Eight	Deep	2021-10-09
Laurencia 2	0	Eight	Deep	2021-10-09
Laurencia 2	0	Eight	Deep	2021-10-09
Laurencia 2	0	Eight	Deep	2021-10-09
Laurencia 2	0	Eight	Deep	2021-10-09
Laurencia 2	0	Eight	Deep	2021-10-09
Laurencia 2	0	Eight	Deep	2021-10-09
Laurencia 2	0	Eight	Deep	2021-10-09
Laurencia 2	0	Eight	Deep	2021-10-09
Laurencia 2	0	Eight	Deep	2021-10-09
Dictyota	0	Eight	Deep	2021-10-09
Dictyota	1	Eight	Deep	2021-10-09
Dictyota	1	Eight	Deep	2021-10-09
Dictyota	1	Eight	Deep	2021-10-09
Dictyota	1	Eight	Deep	2021-10-09
Dictyota	1	Eight	Deep	2021-10-09
Dictyota	1	Eight	Deep	2021-10-09
Dictyota	1	Eight	Deep	2021-10-09
Dictyota	1	Eight	Deep	2021-10-09
Dictyota	1	Eight	Deep	2021-10-09
Dictyota	1	Eight	Deep	2021-10-09
Dictyota	1	Eight	Deep	2021-10-09
Dictyota	1	Eight	Deep	2021-10-09
Dictyota	1	Eight	Deep	2021-10-09
Dictyota	1	Eight	Deep	2021-10-09
Laurencia 1	1	Eight	Deep	2021-10-09
Laurencia 1	1	Eight	Deep	2021-10-09
Laurencia 1	1	Eight	Deep	2021-10-09
Laurencia 1	1	Eight	Deep	2021-10-09
Laurencia 1	1	Eight	Deep	2021-10-09
Laurencia 1	0	Eight	Deep	2021-10-09
Laurencia 1	0	Eight	Deep	2021-10-09
Laurencia 1	0	Eight	Deep	2021-10-09
Laurencia 1	0	Eight	Deep	2021-10-09
Laurencia 1	0	Eight	Deep	2021-10-09
Laurencia 1	0	Eight	Deep	2021-10-09
Laurencia 1	0	Eight	Deep	2021-10-09
Laurencia 1	0	Eight	Deep	2021-10-09
Laurencia 1	0	Eight	Deep	2021-10-09
Laurencia 1	0	Eight	Deep	2021-10-09
Turbinaria	1	Eight	Deep	2021-10-09
Turbinaria	1	Eight	Deep	2021-10-09
Turbinaria	1	Eight	Deep	2021-10-09
Turbinaria	1	Eight	Deep	2021-10-09
Turbinaria	1	Eight	Deep	2021-10-09
Turbinaria	1	Eight	Deep	2021-10-09
Turbinaria	0	Eight	Deep	2021-10-09
Turbinaria	0	Eight	Deep	2021-10-09
Turbinaria	0	Eight	Deep	2021-10-09
Turbinaria	0	Eight	Deep	2021-10-09
Turbinaria	0	Eight	Deep	2021-10-09
Turbinaria	0	Eight	Deep	2021-10-09
Turbinaria	0	Eight	Deep	2021-10-09
Turbinaria	0	Eight	Deep	2021-10-09
Halimeda	1	Nine	Deep	2021-10-10
Halimeda	1	Nine	Deep	2021-10-10
Halimeda	1	Nine	Deep	2021-10-10
Halimeda	1	Nine	Deep	2021-10-10
Halimeda	1	Nine	Deep	2021-10-10
Halimeda	1	Nine	Deep	2021-10-10
Halimeda	1	Nine	Deep	2021-10-10
Halimeda	1	Nine	Deep	2021-10-10
Halimeda	1	Nine	Deep	2021-10-10
Halimeda	1	Nine	Deep	2021-10-10
Halimeda	1	Nine	Deep	2021-10-10
Halimeda	1	Nine	Deep	2021-10-10
Halimeda	1	Nine	Deep	2021-10-10
Halimeda	1	Nine	Deep	2021-10-10
Halimeda	1	Nine	Deep	2021-10-10
Dictyota	0	Nine	Deep	2021-10-10
Dictyota	1	Nine	Deep	2021-10-10
Dictyota	1	Nine	Deep	2021-10-10
Dictyota	1	Nine	Deep	2021-10-10
Dictyota	1	Nine	Deep	2021-10-10
Dictyota	1	Nine	Deep	2021-10-10
Dictyota	1	Nine	Deep	2021-10-10
Dictyota	1	Nine	Deep	2021-10-10
Dictyota	1	Nine	Deep	2021-10-10
Dictyota	1	Nine	Deep	2021-10-10
Dictyota	1	Nine	Deep	2021-10-10
Dictyota	1	Nine	Deep	2021-10-10
Dictyota	1	Nine	Deep	2021-10-10
Dictyota	1	Nine	Deep	2021-10-10
Dictyota	1	Nine	Deep	2021-10-10
Thalassia	0	Nine	Deep	2021-10-10
Thalassia	0	Nine	Deep	2021-10-10
Thalassia	0	Nine	Deep	2021-10-10
Thalassia	0	Nine	Deep	2021-10-10
Thalassia	0	Nine	Deep	2021-10-10
Thalassia	0	Nine	Deep	2021-10-10
Thalassia	0	Nine	Deep	2021-10-10
Thalassia	0	Nine	Deep	2021-10-10
Thalassia	0	Nine	Deep	2021-10-10
Thalassia	0	Nine	Deep	2021-10-10
Thalassia	0	Nine	Deep	2021-10-10
Thalassia	0	Nine	Deep	2021-10-10
Thalassia	0	Nine	Deep	2021-10-10
Thalassia	0	Nine	Deep	2021-10-10
Thalassia	0	Nine	Deep	2021-10-10
Lobophora	1	Nine	Deep	2021-10-10
Lobophora	0	Nine	Deep	2021-10-10
Lobophora	0	Nine	Deep	2021-10-10
Lobophora	0	Nine	Deep	2021-10-10
Lobophora	0	Nine	Deep	2021-10-10
Lobophora	0	Nine	Deep	2021-10-10
Lobophora	0	Nine	Deep	2021-10-10
Lobophora	0	Nine	Deep	2021-10-10
Lobophora	0	Nine	Deep	2021-10-10
Lobophora	0	Nine	Deep	2021-10-10
Lobophora	0	Nine	Deep	2021-10-10
Lobophora	0	Nine	Deep	2021-10-10
Lobophora	0	Nine	Deep	2021-10-10
Lobophora	0	Nine	Deep	2021-10-10
Lobophora	0	Nine	Deep	2021-10-10
Palisada	0	Ten	Deep	2021-10-13
Palisada	0	Ten	Deep	2021-10-13
Palisada	0	Ten	Deep	2021-10-13
Palisada	0	Ten	Deep	2021-10-13
Palisada	0	Ten	Deep	2021-10-13
Palisada	0	Ten	Deep	2021-10-13
Palisada	0	Ten	Deep	2021-10-13
Palisada	0	Ten	Deep	2021-10-13
Palisada	0	Ten	Deep	2021-10-13
Palisada	0	Ten	Deep	2021-10-13
Palisada	0	Ten	Deep	2021-10-13
Palisada	0	Ten	Deep	2021-10-13
Palisada	0	Ten	Deep	2021-10-13
Palisada	0	Ten	Deep	2021-10-13
Palisada	0	Ten	Deep	2021-10-13
Thalassia	1	Ten	Deep	2021-10-13
Thalassia	0	Ten	Deep	2021-10-13
Thalassia	0	Ten	Deep	2021-10-13
Thalassia	0	Ten	Deep	2021-10-13
Thalassia	0	Ten	Deep	2021-10-13
Thalassia	0	Ten	Deep	2021-10-13
Thalassia	0	Ten	Deep	2021-10-13
Thalassia	0	Ten	Deep	2021-10-13
Thalassia	0	Ten	Deep	2021-10-13
Thalassia	0	Ten	Deep	2021-10-13
Thalassia	0	Ten	Deep	2021-10-13
Thalassia	0	Ten	Deep	2021-10-13
Thalassia	0	Ten	Deep	2021-10-13
Thalassia	0	Ten	Deep	2021-10-13
Thalassia	0	Ten	Deep	2021-10-13
Galaxaura	1	Ten	Deep	2021-10-13
Galaxaura	1	Ten	Deep	2021-10-13
Galaxaura	1	Ten	Deep	2021-10-13
Galaxaura	1	Ten	Deep	2021-10-13
Galaxaura	1	Ten	Deep	2021-10-13
Galaxaura	1	Ten	Deep	2021-10-13
Galaxaura	1	Ten	Deep	2021-10-13
Galaxaura	1	Ten	Deep	2021-10-13
Galaxaura	1	Ten	Deep	2021-10-13
Galaxaura	1	Ten	Deep	2021-10-13
Galaxaura	0	Ten	Deep	2021-10-13
Galaxaura	0	Ten	Deep	2021-10-13
Galaxaura	0	Ten	Deep	2021-10-13
Galaxaura	0	Ten	Deep	2021-10-13
Galaxaura	0	Ten	Deep	2021-10-13
Dictyota	0	Ten	Deep	2021-10-13
Dictyota	1	Ten	Deep	2021-10-13
Dictyota	1	Ten	Deep	2021-10-13
Dictyota	1	Ten	Deep	2021-10-13
Dictyota	1	Ten	Deep	2021-10-13
Dictyota	1	Ten	Deep	2021-10-13
Dictyota	1	Ten	Deep	2021-10-13
Dictyota	1	Ten	Deep	2021-10-13
Dictyota	1	Ten	Deep	2021-10-13
Dictyota	1	Ten	Deep	2021-10-13
Dictyota	1	Ten	Deep	2021-10-13
Dictyota	1	Ten	Deep	2021-10-13
Dictyota	1	Ten	Deep	2021-10-13
Dictyota	1	Ten	Deep	2021-10-13
Dictyota	1	Ten	Deep	2021-10-13
Palisada	1	Eleven	Deep	2021-10-16
Palisada	0	Eleven	Deep	2021-10-16
Palisada	0	Eleven	Deep	2021-10-16
Palisada	0	Eleven	Deep	2021-10-16
Palisada	0	Eleven	Deep	2021-10-16
Palisada	0	Eleven	Deep	2021-10-16
Palisada	0	Eleven	Deep	2021-10-16
Palisada	0	Eleven	Deep	2021-10-16
Palisada	0	Eleven	Deep	2021-10-16
Palisada	0	Eleven	Deep	2021-10-16
Palisada	0	Eleven	Deep	2021-10-16
Palisada	0	Eleven	Deep	2021-10-16
Palisada	0	Eleven	Deep	2021-10-16
Palisada	0	Eleven	Deep	2021-10-16
Palisada	0	Eleven	Deep	2021-10-16
Lobophora	1	Eleven	Deep	2021-10-16
Lobophora	0	Eleven	Deep	2021-10-16
Lobophora	0	Eleven	Deep	2021-10-16
Lobophora	0	Eleven	Deep	2021-10-16
Lobophora	0	Eleven	Deep	2021-10-16
Lobophora	0	Eleven	Deep	2021-10-16
Lobophora	0	Eleven	Deep	2021-10-16
Lobophora	0	Eleven	Deep	2021-10-16
Lobophora	0	Eleven	Deep	2021-10-16
Lobophora	0	Eleven	Deep	2021-10-16
Lobophora	0	Eleven	Deep	2021-10-16
Lobophora	0	Eleven	Deep	2021-10-16
Lobophora	0	Eleven	Deep	2021-10-16
Lobophora	0	Eleven	Deep	2021-10-16
Lobophora	0	Eleven	Deep	2021-10-16
Laurencia 1	1	Eleven	Deep	2021-10-16
Laurencia 1	0	Eleven	Deep	2021-10-16
Laurencia 1	0	Eleven	Deep	2021-10-16
Laurencia 1	0	Eleven	Deep	2021-10-16
Laurencia 1	0	Eleven	Deep	2021-10-16
Laurencia 1	0	Eleven	Deep	2021-10-16
Laurencia 1	0	Eleven	Deep	2021-10-16
Laurencia 1	0	Eleven	Deep	2021-10-16
Laurencia 1	0	Eleven	Deep	2021-10-16
Laurencia 1	0	Eleven	Deep	2021-10-16
Laurencia 1	0	Eleven	Deep	2021-10-16
Laurencia 1	0	Eleven	Deep	2021-10-16
Laurencia 1	0	Eleven	Deep	2021-10-16
Laurencia 1	0	Eleven	Deep	2021-10-16
Laurencia 1	0	Eleven	Deep	2021-10-16
Turbinaria	1	Eleven	Deep	2021-10-16
Turbinaria	1	Eleven	Deep	2021-10-16
Turbinaria	1	Eleven	Deep	2021-10-16
Turbinaria	1	Eleven	Deep	2021-10-16
Turbinaria	1	Eleven	Deep	2021-10-16
Turbinaria	1	Eleven	Deep	2021-10-16
Turbinaria	1	Eleven	Deep	2021-10-16
Turbinaria	1	Eleven	Deep	2021-10-16
Turbinaria	1	Eleven	Deep	2021-10-16
Turbinaria	1	Eleven	Deep	2021-10-16
Turbinaria	1	Eleven	Deep	2021-10-16
Turbinaria	0	Eleven	Deep	2021-10-16
Turbinaria	0	Eleven	Deep	2021-10-16
Turbinaria	0	Eleven	Deep	2021-10-16
Turbinaria	0	Eleven	Deep	2021-10-16
Lobophora	0	Twelve	Deep	2021-10-16
Lobophora	0	Twelve	Deep	2021-10-16
Lobophora	0	Twelve	Deep	2021-10-16
Lobophora	0	Twelve	Deep	2021-10-16
Lobophora	0	Twelve	Deep	2021-10-16
Lobophora	0	Twelve	Deep	2021-10-16
Lobophora	0	Twelve	Deep	2021-10-16
Lobophora	0	Twelve	Deep	2021-10-16
Lobophora	0	Twelve	Deep	2021-10-16
Lobophora	0	Twelve	Deep	2021-10-16
Lobophora	0	Twelve	Deep	2021-10-16
Lobophora	0	Twelve	Deep	2021-10-16
Lobophora	0	Twelve	Deep	2021-10-16
Lobophora	0	Twelve	Deep	2021-10-16
Lobophora	0	Twelve	Deep	2021-10-16
Laurencia 1	0	Twelve	Deep	2021-10-16
Laurencia 1	0	Twelve	Deep	2021-10-16
Laurencia 1	0	Twelve	Deep	2021-10-16
Laurencia 1	0	Twelve	Deep	2021-10-16
Laurencia 1	0	Twelve	Deep	2021-10-16
Laurencia 1	0	Twelve	Deep	2021-10-16
Laurencia 1	0	Twelve	Deep	2021-10-16
Laurencia 1	0	Twelve	Deep	2021-10-16
Laurencia 1	0	Twelve	Deep	2021-10-16
Laurencia 1	0	Twelve	Deep	2021-10-16
Laurencia 1	0	Twelve	Deep	2021-10-16
Laurencia 1	0	Twelve	Deep	2021-10-16
Laurencia 1	0	Twelve	Deep	2021-10-16
Laurencia 1	0	Twelve	Deep	2021-10-16
Laurencia 1	0	Twelve	Deep	2021-10-16
Thalassia	0	Twelve	Deep	2021-10-16
Thalassia	0	Twelve	Deep	2021-10-16
Thalassia	0	Twelve	Deep	2021-10-16
Thalassia	0	Twelve	Deep	2021-10-16
Thalassia	0	Twelve	Deep	2021-10-16
Thalassia	0	Twelve	Deep	2021-10-16
Thalassia	0	Twelve	Deep	2021-10-16
Thalassia	0	Twelve	Deep	2021-10-16
Thalassia	0	Twelve	Deep	2021-10-16
Thalassia	0	Twelve	Deep	2021-10-16
Thalassia	0	Twelve	Deep	2021-10-16
Thalassia	0	Twelve	Deep	2021-10-16
Thalassia	0	Twelve	Deep	2021-10-16
Thalassia	0	Twelve	Deep	2021-10-16
Thalassia	0	Twelve	Deep	2021-10-16
Galaxaura	0	Twelve	Deep	2021-10-16
Galaxaura	0	Twelve	Deep	2021-10-16
Galaxaura	0	Twelve	Deep	2021-10-16
Galaxaura	0	Twelve	Deep	2021-10-16
Galaxaura	0	Twelve	Deep	2021-10-16
Galaxaura	0	Twelve	Deep	2021-10-16
Galaxaura	0	Twelve	Deep	2021-10-16
Galaxaura	0	Twelve	Deep	2021-10-16
Galaxaura	0	Twelve	Deep	2021-10-16
Galaxaura	0	Twelve	Deep	2021-10-16
Galaxaura	0	Twelve	Deep	2021-10-16
Galaxaura	0	Twelve	Deep	2021-10-16
Galaxaura	0	Twelve	Deep	2021-10-16
Galaxaura	0	Twelve	Deep	2021-10-16
Galaxaura	0	Twelve	Deep	2021-10-16
Halimeda	1	Thirteen	Deep	2021-10-17
Halimeda	1	Thirteen	Deep	2021-10-17
Halimeda	1	Thirteen	Deep	2021-10-17
Halimeda	1	Thirteen	Deep	2021-10-17
Halimeda	1	Thirteen	Deep	2021-10-17
Halimeda	1	Thirteen	Deep	2021-10-17
Halimeda	1	Thirteen	Deep	2021-10-17
Halimeda	1	Thirteen	Deep	2021-10-17
Halimeda	1	Thirteen	Deep	2021-10-17
Halimeda	1	Thirteen	Deep	2021-10-17
Halimeda	1	Thirteen	Deep	2021-10-17
Halimeda	1	Thirteen	Deep	2021-10-17
Halimeda	1	Thirteen	Deep	2021-10-17
Halimeda	1	Thirteen	Deep	2021-10-17
Halimeda	1	Thirteen	Deep	2021-10-17
Laurencia 2	1	Thirteen	Deep	2021-10-17
Laurencia 2	1	Thirteen	Deep	2021-10-17
Laurencia 2	1	Thirteen	Deep	2021-10-17
Laurencia 2	1	Thirteen	Deep	2021-10-17
Laurencia 2	1	Thirteen	Deep	2021-10-17
Laurencia 2	1	Thirteen	Deep	2021-10-17
Laurencia 2	1	Thirteen	Deep	2021-10-17
Laurencia 2	1	Thirteen	Deep	2021-10-17
Laurencia 2	0	Thirteen	Deep	2021-10-17
Laurencia 2	0	Thirteen	Deep	2021-10-17
Laurencia 2	0	Thirteen	Deep	2021-10-17
Laurencia 2	0	Thirteen	Deep	2021-10-17
Laurencia 2	0	Thirteen	Deep	2021-10-17
Laurencia 2	0	Thirteen	Deep	2021-10-17
Laurencia 2	0	Thirteen	Deep	2021-10-17
Palisada	0	Thirteen	Deep	2021-10-17
Palisada	0	Thirteen	Deep	2021-10-17
Palisada	0	Thirteen	Deep	2021-10-17
Palisada	0	Thirteen	Deep	2021-10-17
Palisada	0	Thirteen	Deep	2021-10-17
Palisada	0	Thirteen	Deep	2021-10-17
Palisada	0	Thirteen	Deep	2021-10-17
Palisada	0	Thirteen	Deep	2021-10-17
Palisada	0	Thirteen	Deep	2021-10-17
Palisada	0	Thirteen	Deep	2021-10-17
Palisada	0	Thirteen	Deep	2021-10-17
Palisada	0	Thirteen	Deep	2021-10-17
Palisada	0	Thirteen	Deep	2021-10-17
Palisada	0	Thirteen	Deep	2021-10-17
Palisada	0	Thirteen	Deep	2021-10-17
Galaxaura	1	Thirteen	Deep	2021-10-17
Galaxaura	0	Thirteen	Deep	2021-10-17
Galaxaura	0	Thirteen	Deep	2021-10-17
Galaxaura	0	Thirteen	Deep	2021-10-17
Galaxaura	0	Thirteen	Deep	2021-10-17
Galaxaura	0	Thirteen	Deep	2021-10-17
Galaxaura	0	Thirteen	Deep	2021-10-17
Galaxaura	0	Thirteen	Deep	2021-10-17
Galaxaura	0	Thirteen	Deep	2021-10-17
Galaxaura	0	Thirteen	Deep	2021-10-17
Galaxaura	0	Thirteen	Deep	2021-10-17
Galaxaura	0	Thirteen	Deep	2021-10-17
Galaxaura	0	Thirteen	Deep	2021-10-17
Galaxaura	0	Thirteen	Deep	2021-10-17
Galaxaura	0	Thirteen	Deep	2021-10-17
Halimeda	1	Fourteen	Deep	2021-10-17
Halimeda	1	Fourteen	Deep	2021-10-17
Halimeda	1	Fourteen	Deep	2021-10-17
Halimeda	1	Fourteen	Deep	2021-10-17
Halimeda	1	Fourteen	Deep	2021-10-17
Halimeda	1	Fourteen	Deep	2021-10-17
Halimeda	1	Fourteen	Deep	2021-10-17
Halimeda	1	Fourteen	Deep	2021-10-17
Halimeda	1	Fourteen	Deep	2021-10-17
Halimeda	1	Fourteen	Deep	2021-10-17
Halimeda	1	Fourteen	Deep	2021-10-17
Halimeda	1	Fourteen	Deep	2021-10-17
Halimeda	1	Fourteen	Deep	2021-10-17
Halimeda	1	Fourteen	Deep	2021-10-17
Laurencia 2	1	Fourteen	Deep	2021-10-17
Laurencia 2	1	Fourteen	Deep	2021-10-17
Laurencia 2	1	Fourteen	Deep	2021-10-17
Laurencia 2	1	Fourteen	Deep	2021-10-17
Laurencia 2	1	Fourteen	Deep	2021-10-17
Laurencia 2	1	Fourteen	Deep	2021-10-17
Laurencia 2	0	Fourteen	Deep	2021-10-17
Laurencia 2	0	Fourteen	Deep	2021-10-17
Laurencia 2	0	Fourteen	Deep	2021-10-17
Laurencia 2	0	Fourteen	Deep	2021-10-17
Laurencia 2	0	Fourteen	Deep	2021-10-17
Laurencia 2	0	Fourteen	Deep	2021-10-17
Laurencia 2	0	Fourteen	Deep	2021-10-17
Laurencia 2	0	Fourteen	Deep	2021-10-17
Turbinaria	1	Fourteen	Deep	2021-10-17
Turbinaria	1	Fourteen	Deep	2021-10-17
Turbinaria	0	Fourteen	Deep	2021-10-17
Turbinaria	0	Fourteen	Deep	2021-10-17
Turbinaria	0	Fourteen	Deep	2021-10-17
Turbinaria	0	Fourteen	Deep	2021-10-17
Turbinaria	0	Fourteen	Deep	2021-10-17
Turbinaria	0	Fourteen	Deep	2021-10-17
Turbinaria	0	Fourteen	Deep	2021-10-17
Turbinaria	0	Fourteen	Deep	2021-10-17
Turbinaria	0	Fourteen	Deep	2021-10-17
Turbinaria	0	Fourteen	Deep	2021-10-17
Turbinaria	0	Fourteen	Deep	2021-10-17
Turbinaria	0	Fourteen	Deep	2021-10-17
Galaxaura	0	Fourteen	Deep	2021-10-17
Galaxaura	0	Fourteen	Deep	2021-10-17
Galaxaura	0	Fourteen	Deep	2021-10-17
Galaxaura	0	Fourteen	Deep	2021-10-17
Galaxaura	0	Fourteen	Deep	2021-10-17
Galaxaura	0	Fourteen	Deep	2021-10-17
Galaxaura	0	Fourteen	Deep	2021-10-17
Galaxaura	0	Fourteen	Deep	2021-10-17
Galaxaura	0	Fourteen	Deep	2021-10-17
Galaxaura	0	Fourteen	Deep	2021-10-17
Galaxaura	0	Fourteen	Deep	2021-10-17
Galaxaura	0	Fourteen	Deep	2021-10-17
Galaxaura	0	Fourteen	Deep	2021-10-17
Galaxaura	0	Fourteen	Deep	2021-10-17

## Sheet: Species Preference
Herbivorous Fish Species	Percent of Bites Taken of Macrophyte Species	Macrophyte Species	Depth
Acanthurus spp.	0	Dictyota	Deep
Acanthurus spp.	13.1626	Galaxaura	Deep
Acanthurus spp.	0.928069	Halimeda	Deep
Acanthurus spp.	43.8908	Laurencia 1	Deep
Acanthurus spp.	12.9367	Laurencia 2	Deep
Acanthurus spp.	6.18713	Lobophora	Deep
Acanthurus spp.	14.0255	Palisada	Deep
Acanthurus spp.	2.3727	Thalassia	Deep
Acanthurus spp.	6.49648	Turbinaria	Deep
Melichthys niger	0	Dictyota	Deep
Melichthys niger	0	Galaxaura	Deep
Melichthys niger	0	Halimeda	Deep
Melichthys niger	6.06061	Laurencia 1	Deep
Melichthys niger	0	Laurencia 2	Deep
Melichthys niger	0	Lobophora	Deep
Melichthys niger	93.9394	Palisada	Deep
Melichthys niger	0	Thalassia	Deep
Melichthys niger	0	Turbinaria	Deep
Sparisoma aurofrenatum (I)	5.25265	Dictyota	Deep
Sparisoma aurofrenatum (I)	0	Galaxaura	Deep
Sparisoma aurofrenatum (I)	0	Halimeda	Deep
Sparisoma aurofrenatum (I)	10.1089	Laurencia 1	Deep
Sparisoma aurofrenatum (I)	0	Laurencia 2	Deep
Sparisoma aurofrenatum (I)	10.5053	Lobophora	Deep
Sparisoma aurofrenatum (I)	0	Palisada	Deep
Sparisoma aurofrenatum (I)	36.4054	Thalassia	Deep
Sparisoma aurofrenatum (I)	37.7278	Turbinaria	Deep
Sparisoma aurofrenatum (T)	0	Dictyota	Deep
Sparisoma aurofrenatum (T)	0	Galaxaura	Deep
Sparisoma aurofrenatum (T)	25	Halimeda	Deep
Sparisoma aurofrenatum (T)	0	Laurencia 1	Deep
Sparisoma aurofrenatum (T)	0	Laurencia 2	Deep
Sparisoma aurofrenatum (T)	0	Lobophora	Deep
Sparisoma aurofrenatum (T)	0	Palisada	Deep
Sparisoma aurofrenatum (T)	75	Thalassia	Deep
Sparisoma aurofrenatum (T)	0	Turbinaria	Deep
Sparisoma rubripinne (I)	13.7931	Dictyota	Deep
Sparisoma rubripinne (I)	27.5862	Galaxaura	Deep
Sparisoma rubripinne (I)	0	Halimeda	Deep
Sparisoma rubripinne (I)	0	Laurencia 1	Deep
Sparisoma rubripinne (I)	0	Laurencia 2	Deep
Sparisoma rubripinne (I)	13.7931	Lobophora	Deep
Sparisoma rubripinne (I)	0	Palisada	Deep
Sparisoma rubripinne (I)	44.8276	Thalassia	Deep
Sparisoma rubripinne (I)	0	Turbinaria	Deep
Acanthurus spp.	4.45489	Dictyota	Shallow
Acanthurus spp.	2.45616	Galaxaura	Shallow
Acanthurus spp.	0	Halimeda	Shallow
Acanthurus spp.	23.0806	Laurencia 1	Shallow
Acanthurus spp.	18.0681	Laurencia 2	Shallow
Acanthurus spp.	0.376984	Lobophora	Shallow
Acanthurus spp.	47.8399	Palisada	Shallow
Acanthurus spp.	0.740938	Thalassia	Shallow
Acanthurus spp.	2.9824	Turbinaria	Shallow
Sparisoma rubripinne (I)	3.34761	Dictyota	Shallow
Sparisoma rubripinne (I)	5.42397	Galaxaura	Shallow
Sparisoma rubripinne (I)	0	Halimeda	Shallow
Sparisoma rubripinne (I)	0	Laurencia 1	Shallow
Sparisoma rubripinne (I)	0	Laurencia 2	Shallow
Sparisoma rubripinne (I)	42.5632	Lobophora	Shallow
Sparisoma rubripinne (I)	10.0428	Palisada	Shallow
Sparisoma rubripinne (I)	15.3347	Thalassia	Shallow
Sparisoma rubripinne (I)	23.2877	Turbinaria	Shallow
Sparisoma viride (I)	0	Dictyota	Shallow
Sparisoma viride (I)	0	Galaxaura	Shallow
Sparisoma viride (I)	0	Halimeda	Shallow
Sparisoma viride (I)	0	Laurencia 1	Shallow
Sparisoma viride (I)	0	Laurencia 2	Shallow
Sparisoma viride (I)	0	Lobophora	Shallow
Sparisoma viride (I)	6.61007	Palisada	Shallow
Sparisoma viride (I)	93.3899	Thalassia	Shallow
Sparisoma viride (I)	0	Turbinaria	Shallow
