# Supplementary material for: Comparison of feeding preferences of herbivorous fishes and the sea urchin Diadema antillarum in Little Cayman
Source: PeerJ. 2023 Nov 15;11:e16264. doi: 10.7717/peerj.16264 (PMC10656904; doi:10.7717/peerj.16264)
Supplement: Supplemental Information 6 — Data from every trial conducted for these feeding assays in December 2017 and May 2018. [file peerj-11-16264-s006.xlsx]

## Sheet: Metadata
Project Title	Comparison of feeding preferences of herbivorous fishes and the sea urchin Diadema antillarum in Little Cayman
Contact Info	Lindsay Spiers- Lindsay.Spiers@MyFWC.com
Location	Little Cayman, Cayman Islands
Type of experiment	Choice feeding assay conducted in a laboratory setting
Experiment dates	December 2017 and May 2018
Information contained within each tab	Each tab is a different feeding assay trial. Within each tab is the amount eaten and proportion eaten of each macrophyte. Both the raw data and the average amount consumed and standard error are provided.

## Sheet: Trial 1
Macrophyte Species	Average Amount Eaten (g)	SE		Amount Eaten (g)	Proportion Eaten	Macrophyte Species
Turbinaria	1.22331	0.236507		0.863128	0.246608	Turbinaria
Palisada	2.49851	0.408145		0.339665	0.0828451	Turbinaria
Thallasia	0.106504	0.190205		1.54358	0.385894	Turbinaria
Galaxaura	2.91134	0.451152		1.04358	0.260894	Turbinaria
				2.14749	0.550637	Turbinaria
				1.67095	0.506348	Turbinaria
				1.86704	0.549129	Turbinaria
				0.151397	0.0398412	Turbinaria
				2.61229	0.544227	Turbinaria
				-0.0798883	-0.017367	Turbinaria
				1.62402	0.360894	Turbinaria
				0.459218	0.127561	Turbinaria
				-0.175978	-0.0391061	Turbinaria
				2.32402	0.516449	Turbinaria
				1.95922	0.544227	Turbinaria
				3.27363	0.935323	Palisada
				-0.578109	-0.134444	Palisada
				2.5607	0.69208	Palisada
				1.84129	0.460323	Palisada
				-0.332836	-0.0924544	Palisada
				3.92836	0.935323	Palisada
				3.25423	0.856376	Palisada
				3.1801	0.935323	Palisada
				2.22189	0.516719	Palisada
				3.92189	0.912068	Palisada
				3.92836	0.935323	Palisada
				3.55423	0.935323	Palisada
				-0.0393035	-0.0106226	Palisada
				3.62836	0.863895	Palisada
				3.13483	0.764592	Palisada
				0.27561	0.0950378	Thallasia
				-0.136585	-0.0593849	Thallasia
				0.0487805	0.0203252	Thallasia
				-0.00731707	-0.00348432	Thallasia
				-0.292683	-0.146341	Thallasia
				0.14878	0.0619919	Thallasia
				-0.0219512	-0.00997783	Thallasia
				-0.321951	-0.146341	Thallasia
				-0.592683	-0.296341	Thallasia
				-0.0926829	-0.0463415	Thallasia
				-0.107317	-0.0511034	Thallasia
				-0.521951	-0.237251	Thallasia
				1.87805	0.853659	Thallasia
				-0.421951	-0.191796	Thallasia
				1.76341	0.766702	Thallasia
				4.37104	0.950226	Galaxaura
				2.36606	0.503418	Galaxaura
				0.795928	0.194129	Galaxaura
				3.04615	0.597285	Galaxaura
				0.200905	0.0502262	Galaxaura
				4.46606	0.950226	Galaxaura
				3.89593	0.950226	Galaxaura
				4.46606	0.950226	Galaxaura
				4.08597	0.950226	Galaxaura
				4.46606	0.950226	Galaxaura
				0.156109	0.0318589	Galaxaura
				3.29095	0.78356	Galaxaura
				-0.0140271	-0.00326213	Galaxaura
				3.89593	0.950226	Galaxaura
				4.181	0.950226	Galaxaura

## Sheet: Trial 2
Macrophyte Species	Average Amount Eaten (g)	SE		Amount Eaten (g)	Proportion Eaten	Macrophyte Species
Lobophora	0.557869	0.338327		3.4139	0.898396	Lobophora
Laurencia 1	3.77255	0.0950578		-0.586096	-0.154236	Lobophora
Thallasia	1.67947	0.311705		-0.496257	-0.127245	Lobophora
Galaxaura	2.90563	0.272819		-0.696257	-0.178527	Lobophora
				1.10374	0.283011	Lobophora
				1.70374	0.436857	Lobophora
				1.25294	0.284759	Lobophora
				0.263102	0.0611864	Lobophora
				0.373262	0.0888719	Lobophora
				2.13422	0.59284	Lobophora
				-0.626738	-0.149223	Lobophora
				-0.706417	-0.176604	Lobophora
				1.00374	0.25737	Lobophora
				-0.326738	-0.0777948	Lobophora
				4.19409	0.975369	Laurencia 1
				3.51133	0.975369	Laurencia 1
				3.49901	0.853418	Laurencia 1
				3.5064	0.922738	Laurencia 1
				4.19409	0.975369	Laurencia 1
				3.99901	0.975369	Laurencia 1
				3.80394	0.975369	Laurencia 1
				3.80394	0.975369	Laurencia 1
				3.99901	0.975369	Laurencia 1
				4.38916	0.975369	Laurencia 1
				3.51133	0.975369	Laurencia 1
				3.1064	0.817475	Laurencia 1
				3.80394	0.975369	Laurencia 1
				3.49409	0.812579	Laurencia 1
				0.0256281	0.00692653	Thallasia
				1.52362	0.400952	Thallasia
				0.323618	0.0851627	Thallasia
				0.021608	0.00554052	Thallasia
				1.32161	0.338874	Thallasia
				3.81357	0.886876	Thallasia
				0.317588	0.0774605	Thallasia
				2.6196	0.654899	Thallasia
				2.32764	0.646566	Thallasia
				1.72764	0.479899	Thallasia
				2.52362	0.66411	Thallasia
				2.62362	0.690426	Thallasia
				1.72161	0.441438	Thallasia
				2.62161	0.672207	Thallasia
				3.40049	0.871921	Galaxaura
				3.57488	0.871921	Galaxaura
				0.887685	0.221921	Galaxaura
				2.87488	0.701189	Galaxaura
				3.92365	0.871921	Galaxaura
				3.66207	0.871921	Galaxaura
				1.40049	0.359101	Galaxaura
				3.57488	0.871921	Galaxaura
				3.3133	0.871921	Galaxaura
				3.48768	0.871921	Galaxaura
				0.987685	0.246921	Galaxaura
				3.13892	0.871921	Galaxaura
				3.3133	0.871921	Galaxaura
				3.13892	0.871921	Galaxaura

## Sheet: Trial 3
Macrophyte Species	Average Amount Eaten (g)	SE		Amount Eaten (g)	Proportion Eaten	Macrophyte Species
Halimeda	0.947469	0.313244		-0.581152	-0.161431	Halimeda
Laurencia 1	2.99631	0.277698		1.31885	0.366347	Halimeda
Thallasia	1.5989	0.209314		0.319372	0.0863167	Halimeda
Dictyota	2.01105	0.400866		0.919895	0.242078	Halimeda
				3.4199	0.899972	Halimeda
				0.419895	0.110499	Halimeda
				0.720942	0.180236	Halimeda
				-0.0769634	-0.0174917	Halimeda
				0.622513	0.14477	Halimeda
				3.61885	1.00524	Halimeda
				2.1199	0.557867	Halimeda
				0.722513	0.168026	Halimeda
				0.224607	0.0477888	Halimeda
				0.220419	0.0565177	Halimeda
				0.222513	0.0517472	Halimeda
				2.9799	0.784184	Laurencia 1
				2.49095	0.673231	Laurencia 1
				3.52462	0.81968	Laurencia 1
				-0.0311558	-0.00798866	Laurencia 1
				3.55779	0.889447	Laurencia 1
				3.1799	0.836816	Laurencia 1
				3.3799	0.889447	Laurencia 1
				3.55779	0.889447	Laurencia 1
				1.40201	0.389447	Laurencia 1
				3.91357	0.889447	Laurencia 1
				3.3799	0.889447	Laurencia 1
				4.00251	0.889447	Laurencia 1
				3.90251	0.867225	Laurencia 1
				3.22462	0.749912	Laurencia 1
				2.4799	0.652605	Laurencia 1
				1.97363	0.411172	Thallasia
				1.38077	0.394505	Thallasia
				1.48022	0.411172	Thallasia
				1.68022	0.466728	Thallasia
				2.67637	0.622412	Thallasia
				2.98022	0.827839	Thallasia
				0.979121	0.257663	Thallasia
				-0.122527	-0.0298847	Thallasia
				2.67857	0.686813	Thallasia
				0.77967	0.210722	Thallasia
				1.78077	0.508791	Thallasia
				1.57967	0.426938	Thallasia
				0.779121	0.205032	Thallasia
				1.77967	0.480992	Thallasia
				1.57802	0.394505	Thallasia
				1.63646	0.442288	Dictyota
				3.30994	0.769755	Dictyota
				3.11436	0.741515	Dictyota
				-0.454696	-0.129913	Dictyota
				2.24088	0.622468	Dictyota
				3.81878	0.931411	Dictyota
				-0.059116	-0.0164211	Dictyota
				3.72762	0.955801	Dictyota
				-0.00331492	-0.000720634	Dictyota
				3.7232	0.930801	Dictyota
				4.10994	0.955801	Dictyota
				1.20994	0.281382	Dictyota
				0.936464	0.253098	Dictyota
				1.74088	0.483579	Dictyota
				1.11436	0.265325	Dictyota

## Sheet: Trial 4
Macrophyte Species	Average Amount Eaten (g)	SE		Amount Eaten (g)	Proportion Eaten	Macrophyte Species
Halimeda	0.310714	0.169545		0.31	0.0873425	Halimeda
Laurencia 1	2.92143	0.255444		0.5	0.127941	Halimeda
Lobophora	1.04357	0.26441		1.08	0.257977	Halimeda
Dictyota	1.33071	0.371605		-0.01	-0.0027659	Halimeda
				0.47	0.107545	Halimeda
				-0.42	-0.098058	Halimeda
				-0.7	-0.183125	Halimeda
				1.59	0.398454	Halimeda
				0.88	0.204268	Halimeda
				-0.31	-0.0765464	Halimeda
				0.38	0.0913108	Halimeda
				-0.4	-0.102828	Halimeda
				0.5	0.132664	Halimeda
				0.48	0.11512	Halimeda
				3.63	0.863636	Laurencia 1
				2.37	0.607226	Laurencia 1
				3.37	0.863636	Laurencia 1
				0.28	0.0741627	Laurencia 1
				3.63	0.863636	Laurencia 1
				3.02	0.863636	Laurencia 1
				2.75	0.688636	Laurencia 1
				3.89	0.863636	Laurencia 1
				3.11	0.863636	Laurencia 1
				3.51	0.817125	Laurencia 1
				2.33	0.554113	Laurencia 1
				2.01	0.558081	Laurencia 1
				3.2	0.863636	Laurencia 1
				3.8	0.863636	Laurencia 1
				0.85	0.19279	Lobophora
				1.95	0.453889	Lobophora
				3.16	0.790517	Lobophora
				1.35	0.314354	Lobophora
				2.16	0.513136	Lobophora
				0.94	0.204648	Lobophora
				0.37	0.100652	Lobophora
				1.36	0.32266	Lobophora
				1.88	0.521073	Lobophora
				0.66	0.155993	Lobophora
				-0.03	-0.00816697	Lobophora
				-0.26	-0.056705	Lobophora
				-0.03	-0.00745573	Lobophora
				0.25	0.0564263	Lobophora
				-0.44	-0.12205	Dictyota
				0.14	0.0351321	Dictyota
				2.17	0.494112	Dictyota
				0.14	0.0351321	Dictyota
				2.5	0.580793	Dictyota
				-0.05	-0.0109384	Dictyota
				0.51	0.13526	Dictyota
				0.5	0.115677	Dictyota
				2.51	0.661576	Dictyota
				3.3	0.766839	Dictyota
				3.37	0.766839	Dictyota
				3	0.697072	Dictyota
				0.18	0.0376727	Dictyota
				0.8	0.185444	Dictyota

## Sheet: Trial 5
Macrophyte Species	Average Amount Eaten (g)	SE		Amount Eaten (g)	Proportion Eaten	Macrophyte Species
Turbinaria	1.14632	0.285323		2.42143	0.620879	Turbinaria
Palisada	3.58994	0.160112		0.0252747	0.00549451	Turbinaria
Laurencia 2	1.7137	0.377705		0.320879	0.0844419	Turbinaria
Dictyota	1.36983	0.286775		-0.0714286	-0.0137363	Turbinaria
				0.423077	0.100733	Turbinaria
				2.32363	0.540378	Turbinaria
				0.423626	0.0985178	Turbinaria
				1.32253	0.322568	Turbinaria
				0.0197802	0.00549451	Turbinaria
				2.12363	0.493867	Turbinaria
				1.22418	0.278222	Turbinaria
				1.51978	0.422161	Turbinaria
				2.82582	0.601239	Turbinaria
				3.52216	0.978378	Palisada
				3.02216	0.839489	Palisada
				4.58541	0.865171	Palisada
				3.52216	0.978378	Palisada
				3.71784	0.978378	Palisada
				3.71568	0.952737	Palisada
				4.20703	0.978378	Palisada
				3.10703	0.722564	Palisada
				2.81351	0.703378	Palisada
				2.61784	0.688905	Palisada
				3.81568	0.978378	Palisada
				3.81568	0.978378	Palisada
				4.20703	0.978378	Palisada
				3.63743	0.957219	Laurencia 2
				3.44599	0.957219	Laurencia 2
				1.74599	0.484997	Laurencia 2
				-0.071123	-0.0177807	Laurencia 2
				1.83316	0.47004	Laurencia 2
				1.9246	0.469414	Laurencia 2
				3.52032	0.838172	Laurencia 2
				1.13743	0.299325	Laurencia 2
				2.34599	0.651664	Laurencia 2
				0.141711	0.0383003	Laurencia 2
				2.25455	0.663102	Laurencia 2
				-0.471123	-0.117781	Laurencia 2
				0.833155	0.21363	Laurencia 2
				0.345251	0.0908556	Dictyota
				1.55866	0.432961	Dictyota
				0.438547	0.112448	Dictyota
				1.02514	0.250034	Dictyota
				1.43855	0.368858	Dictyota
				1.93855	0.497063	Dictyota
				2.25196	0.608637	Dictyota
				1.70503	0.387506	Dictyota
				1.96536	0.561532	Dictyota
				-0.454749	-0.119671	Dictyota
				2.83184	0.707961	Dictyota
				0.0184358	0.00438947	Dictyota
				2.74525	0.722435	Dictyota

## Sheet: Trial 6
Macrophyte Species	Average Amount Eaten (g)	SE		Amount Eaten (g)	Proportion Eaten	Macrophyte Species
Turbinaria	0.668702	0.291772		2.82308	0.725729	Turbinaria
Laurencia 2	1.62127	0.283539		-0.165813	-0.0382058	Turbinaria
Dictyota	1.80494	0.390359		-0.0723678	-0.0197726	Turbinaria
Galaxaura	2.48539	0.396465		0.165853	0.0442274	Turbinaria
				1.49902	0.417553	Turbinaria
				0.0717004	0.0181062	Turbinaria
				-0.0351359	-0.0092463	Turbinaria
				-0.0226495	-0.00541855	Turbinaria
				0.486248	0.130361	Turbinaria
				-0.0500791	-0.0123652	Turbinaria
				0.306164	0.0722085	Turbinaria
				0.344978	0.0802274	Turbinaria
				3.22506	0.85094	Turbinaria
				0.785769	0.184453	Turbinaria
				0.872069	0.223036	Laurencia 2
				2.61042	0.688765	Laurencia 2
				2.36124	0.61331	Laurencia 2
				1.32418	0.357887	Laurencia 2
				3.65714	0.831167	Laurencia 2
				1.46607	0.359331	Laurencia 2
				1.71418	0.463293	Laurencia 2
				0.666657	0.171819	Laurencia 2
				2.01219	0.498067	Laurencia 2
				0.923718	0.22921	Laurencia 2
				3.10372	0.770153	Laurencia 2
				0.76042	0.200638	Laurencia 2
				1.54984	0.38843	Laurencia 2
				-0.324048	-0.0820375	Laurencia 2
				-0.123497	-0.027383	Dictyota
				0.434783	0.10762	Dictyota
				0.0445635	0.0111969	Dictyota
				2.74405	0.714597	Dictyota
				3.02317	0.83977	Dictyota
				2.10332	0.577835	Dictyota
				0.333429	0.0908526	Dictyota
				2.37405	0.618243	Dictyota
				3.47416	0.897716	Dictyota
				4.115	1.00366	Dictyota
				1.21471	0.302167	Dictyota
				0.754161	0.194874	Dictyota
				1.0035	0.271952	Dictyota
				3.77376	1.00366	Dictyota
				3.46834	0.939929	Galaxaura
				3.35212	0.846495	Galaxaura
				0.342544	0.0946255	Galaxaura
				4.0323	0.939929	Galaxaura
				1.5083	0.359977	Galaxaura
				-0.10947	-0.0286571	Galaxaura
				3.8641	0.907065	Galaxaura
				2.88731	0.714682	Galaxaura
				1.68092	0.422341	Galaxaura
				3.54693	0.914156	Galaxaura
				0.0613074	0.0148086	Galaxaura
				3.36032	0.842185	Galaxaura
				3.21933	0.838367	Galaxaura
				3.58113	0.939929	Galaxaura

## Sheet: Trial 7
Macrophyte Species	Average Amount Eaten (g)	SE		Amount Eaten (g)	Proportion Eaten	Macrophyte Species
Halimeda	0.195066	0.1655		0.0392869	0.00999667	Halimeda
Palisada	2.69949	0.3923		0.629096	0.169112	Halimeda
Laurencia 2	1.09902	0.332072		0.470792	0.134897	Halimeda
Lobophora	0.634275	0.258925		1.50381	0.409758	Halimeda
				-0.132791	-0.0355055	Halimeda
				-0.272981	-0.0773319	Halimeda
				-0.416558	-0.0966492	Halimeda
				-0.270904	-0.0728237	Halimeda
				0.43306	0.111326	Halimeda
				0.156266	0.041671	Halimeda
				0.00664795	0.00159423	Halimeda
				3.40815	0.938886	Palisada
				2.15821	0.523837	Palisada
				3.40815	0.938886	Palisada
				3.30488	0.938886	Palisada
				3.69921	0.938886	Palisada
				2.97999	0.827774	Palisada
				2.80793	0.809203	Palisada
				-0.215237	-0.0495937	Palisada
				3.82126	0.938886	Palisada
				3.54676	0.891147	Palisada
				0.775099	0.210625	Palisada
				-0.035211	-0.0104175	Laurencia 2
				2.04773	0.52105	Laurencia 2
				1.12487	0.285501	Laurencia 2
				-1.09937	-0.261756	Laurencia 2
				2.60201	0.67062	Laurencia 2
				-0.0950756	-0.0221621	Laurencia 2
				1.23631	0.311412	Laurencia 2
				1.41635	0.333258	Laurencia 2
				1.38485	0.364435	Laurencia 2
				2.18193	0.643638	Laurencia 2
				1.32481	0.376366	Laurencia 2
				1.48053	0.390642	Lobophora
				1.98431	0.61244	Lobophora
				-0.288884	-0.0839779	Lobophora
				1.83589	0.479346	Lobophora
				1.2043	0.306437	Lobophora
				0.222424	0.0701652	Lobophora
				0.541543	0.134045	Lobophora
				-0.180044	-0.0521865	Lobophora
				0.127053	0.03326	Lobophora
				0.457201	0.128427	Lobophora
				-0.407297	-0.101066	Lobophora

## Sheet: 20g Trial 2018
Macrophyte Species	Average Amount Eaten (g)	SE		Amount Eaten (g)	Proportion Eaten	Macrophyte Species	Trial
Dictyota	3.65894	0.480823		-0.4456	-0.0233	Dictyota	1
Padina	4.19357	0.516699		5.8842	0.2815	Dictyota	1
Halimeda	2.10972	0.390388		4.631	0.2351	Dictyota	1
Turbinaria	1.9475	0.180869		8.7427	0.4507	Dictyota	1
				3.0427	0.1568	Dictyota	1
				0.2842	0.0136	Dictyota	1
				1.8154	0.0903	Dictyota	1
				-0.0158	-0.0008	Dictyota	1
				0.1427	0.0074	Dictyota	1
				-0.1495	-0.0078	Dictyota	1
				-0.0258	-0.0013	Padina	1
				-1.4722	-0.0751	Padina	1
				3.951	0.2037	Padina	1
				5.4626	0.283	Padina	1
				0.2771	0.0133	Padina	1
				2.5887	0.1245	Padina	1
				6.3394	0.3251	Padina	1
				6.4742	0.3372	Padina	1
				0.7278	0.0371	Padina	1
				2.4583	0.1217	Padina	1
				0.9581	0.0474	Halimeda	1
				-0.0404	-0.0021	Halimeda	1
				5.2579	0.259	Halimeda	1
				0.9598	0.0495	Halimeda	1
				12.6598	0.6526	Halimeda	1
				-0.8425	-0.0411	Halimeda	1
				4.0585	0.2029	Halimeda	1
				3.8598	0.199	Halimeda	1
				0.7592	0.0385	Halimeda	1
				0.4585	0.0229	Halimeda	1
				1.337	0.07	Turbinaria	1
				2.8328	0.146	Turbinaria	1
				1.237	0.0648	Turbinaria	1
				2.2163	0.1076	Turbinaria	1
				3.426	0.1722	Turbinaria	1
				1.7067	0.0801	Turbinaria	1
				1.0301	0.0526	Turbinaria	1
				0.8246	0.0412	Turbinaria	1
				1.0204	0.0503	Turbinaria	1
				3.9301	0.2005	Turbinaria	1
				3.7399	0.1938	Dictyota	2
				1.5396	0.0794	Dictyota	2
				5.8402	0.3042	Dictyota	2
				4.3349	0.2074	Dictyota	2
				1.3377	0.0669	Dictyota	2
				8.2377	0.4119	Dictyota	2
				6.0383	0.305	Dictyota	2
				4.038	0.2029	Dictyota	2
				3.6377	0.1819	Dictyota	2
				12.6374	0.6287	Dictyota	2
				6.92	0.3409	Padina	2
				9.3946	0.4697	Padina	2
				1.6437	0.0847	Padina	2
				5.7607	0.2939	Padina	2
				10.503	0.5225	Padina	2
				6.1776	0.312	Padina	2
				3.0437	0.1569	Padina	2
				4.4437	0.2291	Padina	2
				3.4776	0.1756	Padina	2
				9.0369	0.4408	Padina	2
				3.2209	0.1643	Halimeda	2
				2.0671	0.0994	Halimeda	2
				5.7074	0.2868	Halimeda	2
				3.176	0.1542	Halimeda	2
				0.503	0.0251	Halimeda	2
				0.4254	0.0218	Halimeda	2
				6.2254	0.3193	Halimeda	2
				4.7433	0.2483	Halimeda	2
				4.1299	0.2129	Halimeda	2
				0.2299	0.0118	Halimeda	2
				1.4096	0.0701	Turbinaria	2
				4.0127	0.1967	Turbinaria	2
				1.2044	0.0614	Turbinaria	2
				2.7169	0.1306	Turbinaria	2
				1.3086	0.0654	Turbinaria	2
				2.3033	0.1181	Turbinaria	2
				4.1158	0.1988	Turbinaria	2
				3.42	0.1621	Turbinaria	2
				-0.0008	0	Turbinaria	2
				1.7033	0.0874	Turbinaria	2
				0.9187	0.0469	Dictyota	3
				4.0298	0.1956	Dictyota	3
				1.5276	0.0749	Dictyota	3
				4.9175	0.2522	Dictyota	3
				6.6198	0.336	Dictyota	3
				2.9242	0.1455	Dictyota	3
				4.1187	0.2101	Dictyota	3
				4.4287	0.216	Dictyota	3
				2.2187	0.1132	Dictyota	3
				11.4198	0.5797	Dictyota	3
				8.7285	0.4546	Padina	3
				3.1111	0.1548	Padina	3
				6.4169	0.3241	Padina	3
				5.315	0.2671	Padina	3
				4.6169	0.2332	Padina	3
				9.5053	0.4659	Padina	3
				9.8266	0.5091	Padina	3
				1.715	0.0862	Padina	3
				2.1208	0.1082	Padina	3
				5.1169	0.2584	Padina	3
				3.0411	0.1552	Halimeda	3
				3.5375	0.1701	Halimeda	3
				1.5402	0.0774	Halimeda	3
				3.0381	0.1475	Halimeda	3
				-0.4601	-0.023	Halimeda	3
				1.5414	0.079	Halimeda	3
				2.1414	0.1098	Halimeda	3
				0.8426	0.0441	Halimeda	3
				0.5417	0.0279	Halimeda	3
				1.1417	0.0589	Halimeda	3
				1.1271	0.0564	Turbinaria	3
				1.542	0.0803	Turbinaria	3
				2.1103	0.101	Turbinaria	3
				1.4178	0.0692	Turbinaria	3
				0.9252	0.046	Turbinaria	3
				0.2178	0.0106	Turbinaria	3
				3.6178	0.1765	Turbinaria	3
				1.4308	0.0723	Turbinaria	3
				0.8383	0.0432	Turbinaria	3
				3.1383	0.1618	Turbinaria	3
				2.3966	0.1223	Dictyota	4
				0.6966	0.0355	Dictyota	4
				5.0414	0.2521	Dictyota	4
				0.7862	0.0385	Dictyota	4
				2.3414	0.1171	Dictyota	4
				5.7517	0.2996	Dictyota	4
				5.9241	0.3054	Dictyota	4
				3.1414	0.1571	Dictyota	4
				0.2828	0.0144	Dictyota	4
				1.5586	0.0757	Dictyota	4
				0.2762	0.014	Padina	4
				3.7575	0.1879	Padina	4
				7.9762	0.4049	Padina	4
				-0.1425	-0.0071	Padina	4
				-0.3114	-0.016	Padina	4
				0.6575	0.0329	Padina	4
				0.2948	0.0152	Padina	4
				3.3762	0.1714	Padina	4
				1.5575	0.0779	Padina	4
				6.6451	0.329	Padina	4
				0.6554	0.0324	Halimeda	4
				1.3526	0.0657	Halimeda	4
				-0.141	-0.0072	Halimeda	4
				1.959	0.0994	Halimeda	4
				-0.141	-0.0072	Halimeda	4
				0.0561	0.0028	Halimeda	4
				1.0561	0.0525	Halimeda	4
				2.0554	0.1018	Halimeda	4
				0.5576	0.028	Halimeda	4
				1.5561	0.0774	Halimeda	4
				0.7085	0.0365	Turbinaria	4
				3.4105	0.1767	Turbinaria	4
				-0.2137	-0.0104	Turbinaria	4
				1.7943	0.0893	Turbinaria	4
				2.2802	0.1096	Turbinaria	4
				1.6984	0.0853	Turbinaria	4
				2.1004	0.1061	Turbinaria	4
				3.6964	0.1848	Turbinaria	4
				1.6004	0.0808	Turbinaria	4
				2.7044	0.138	Turbinaria	4
